# Supplementary material for: Genetic Performance of the Semidwarfing Allele sd1 Derived from a Japonica Rice Cultivar and Minimum Requirements to Detect Its Single-Nucleotide Polymorphism by MiSeq Whole-Genome Sequencing
Source: Hindawi journal article supplement (doi:10.1155/2018/4241725), 2018-01-01
Supplement: f1 [file 4241725.f1.pdf]

Supplementary file of DNA sequences of *Sd1/sd1* locus

>Koshihikari\_*Sd1*

TGCCCAGACAGCTCGCCCTGCACACACACACACTCACACTCACACACGCTCTCAACTCACTCCCGCTC  
AACACAGCGCTCACTTCTCATCTCCAATCTCATGGTGGCCGAGCACCCACGCCACCACAGCCGCACCAA  
CCACCGCCCATGGAATCCACCGCCGGCTCTGGCATTGCCGCCCGGGCGGGCGGGCGGTGTGCGACCTGA  
GGATGGAGCCCAAGATCCCGGAGCCATTCTGTGGCCGAACGGCGACGCGAGGCCGGCGTGGCGGGCGGA  
GCTGGACATGCCCGTGGTCGACGTGGGCGTGTCTCCGCGACGGCGACGCCGAGGGGCTGCGCCGCGCCGCG  
GCGCAGGTGGCCGCGCGTGGCCACGCACCGTTTCTTCCAGGTGTCCGAGCACGGCGTGCAGCCGCTC  
TGGCGCGCGCCGCGCTCGACGGCGCCAGCGACTTCTTCCGCCTCCCGCTCGCCGAGAAGCGCCGCGCGCG  
CCGCGTCCCGGGCACCGTGTCCGGCTACACCAGCGCCACGCCGACCGTTTCGCTCCAAGCTCCCATGG  
AAGGAGACCCTCTCCTTCGGCTTCCACGACCGCGCCGCCGCCCGCTCGTCGCCGACTACTTCTCCAGCA  
CCCTCGGCCCCGACTTCGCGCCAATGGGGTAATTAACGATGGTGGACGACATTGCATTTCAAATTCAA  
AACAAATTCAAAACACACCGACCGAGATTATGCTGAATTCAAACGCGTTTGTGCGCGCAGGAGGGTGTAC  
CAGAAGTACTGCGAGGAGATGAAGGAGCTGTGCTGACGATCATGGAACCTGGAGCTGAGCCTGGGCG  
TGGAGCGAGGCTACTACAGGGAGTTCTTCGCGGACAGCAGCTCAATCATGCGGTGCAACTACTACCCGCC  
ATGCCCGGAGCCGGAGCGGACGCTCGGCACGGGCCCGCACTGCGACCCACCGCCCTCACCATCCTCCTC  
CAGGACGACGTGGCGGCCCTCGAGGTCTCGTGCAGCGCAATGGCGCCCGTCAGCCCCGTCCCCGGCG  
CCATGGTCATCAACATCGGCGACACCTTCATGGTAAACCATCTCCTATTCTCCTCTCCTCTGTTCTCCTC  
TGCTTCGAAGCAACAGAACAAGTAATTCAGCTTTTTTTTTCTCTCTCGCGCAAATTGACGAGAAAAATA  
AGATCGTGGTAGGGGCGGGGCTTTCAGCTGAAAGCGGGAAGAAACCGACCTGACGTGATTTCTCTGTTCC  
AATCACAAACAATGGAATGCCCCACTCCTCCATGTGTTATGATTTATCTCACATCTTATAGTTAATAGGA  
GTAAGTAACAAGCTACTTTTTTCATATTATAGTTCGTTTGATTTTTTTTTTTTTAAGTTTTTTAGTTTT  
ATCCAAATTTATTGAAAACTTAGCAACGTTTATAATACAAATTAGTCTCATTTAGTTAATATTGTAT  
ATATTTTGATAATATATTTATGTTATATTAATAATTAATTAATTAATTAATTAATTAATTAATTAATTA  
ATTTATAATATAAAATGGAAGGAGTAATTAATATGGATCTCCCCGACATGAGAATATTTTCCGATGGTG  
TGACGACGCCATGTAAGCTTCGGTGGGCCTGGACGGCCAGAGGTGCCAACAGCCACGTCCAACAACCCCT  
GGGTCCCCCCTAACACTCCAAACAGTAGTGAGTAGTGTCTCGTCGCTTTTAGTATTTGATGACAAACA  
AAGTGTGAGTTGAGTTAGCCACCACCAACTTGCACACGAGCACATACATTTGTGTCCATTCTCGCCAGTC  
ACTTCCATCTCTAGTCCTAACTCCTATCTAGCGATGTAAGCGGATAATTCATCATCCGTATATAAACCT  
GTTTGTTATAGTTAATTTCTATATAATACTATAACAGTATACATTTTAAAAGAAAACAAAATTAGGATA  
AACAGGCCCTGCTCCTATCCATCCATGGCACTTGAAGGACCAGACTCGGTCATGCCATGCCAAGCCAAG  
ATATGGGTTATGGAAGAGTAGAGAAGAGGAGAGATGAGAGATAAGCATGCGTTCTCCTCCTCGTTGGATG  
TGTATTTTGGAGGGATTTGTGTAGTAGTAGCAGCGCGCCGCGGGACGGATGCGGATGGTGGCGCTTTC  
GGTGGCGTTTTCCCGGGGGGGTTTTGGTTTGGCGCTTGGGGGGATGGCATGGCGCGGCGTGGCGCTGCA  
CGCCACACACACGCGCGCGCACGCACGTACGTGCTCGTCGCCGCGGGCGGACGGTAGCTTAGGGTGGTGT

GTTCCGCGCGCGGGCGCGGATTGTTCCATGCCGATCGATTTGGCGCCACCCTCGCCGCGGCTCTTGTCGC  
GTCGTGCGCCTCTCTCGCGCGGTTTGTCTTGTCGCGTTGCTCAGCCGGCGACGGGGGCACGGACATTGG  
CGATGTAGCCCTGCACGTGTCGGCCTCTCCGTTGATGAATGATGATGTATGTATGTATTTTTTTTTGTCT  
GAAGGAATTTGTGGGAATTGTTGTGTGTGCAGGCGCTGTGAACGGGAGGTATAAGAGCTGCCTGCACA  
GGGCGGTGGTGAACCAGCGGCGGGAGCGGCGGTGCTGGCGTTCTTCCTGTGCCCCGCGGAGGACAGGGT  
GGTGCGGCCGCCGCGAGCGCCGCCACGCCGAGCACTACCCGACTTCACCTGGGCGGACCTCATGCGC  
TTCACGCAGCGCCACTACCGCGCCGACACCCGCACGCTCGACGCCCTTACGCGCTGGCTCGCGCCGCCGG  
CCGCCGACGCCGCCGCGACGGCGCAGGTGAGGCGGCCAGCTGATCGCCGAACGGAACGAAACGGAACGA  
ACAGAAGCCGATTTTTGGCGGGGCCACGCCACGTGAGGCCCCACGTGGACAGTGGGCCCCGGCGGAGG  
TGGCACCCACGTGGACCGGGGCCCCGCGCCGCTTCCAATTTGGACCCTACCGCTGTACATATTATA  
TATTGCAAGAAGAAGCAAAACGTACGTGTGGGTTGGGTTGGGCTTCTCTTATTACTAAAAAAATATAA  
TGGAACGACGGATGAATGGATGCTTATTTATTTATCTAAATTGAATTCGAATTCGGCTCA

>Koshihikari Jukkoku\_sd1

TGCCCAGACAGCTCGCCCTGCACACACACACACTCACACTCACACACGCTCTCAACTCACTCCCGCTC  
AACACAGCGCTCACTTCTCATCTCCAATCTCATGGTGGCCGAGCACCCACGCCACCACAGCCGCACCAA  
CCACCGCCCATGGAATCCACCGCCGGCTCTGGCATTGCCGCCCCGGCGGCGGCGGGCGGTGTGCGACCTGA  
GGATGGAGCCCAAGATCCCGGAGCCATTGCTGTGGCCGAACGGCGACGCGAGGCCGGCGTGGCGGGCGGA  
GCTGGACATGCCCGTGGTGCACGTGGGCGTGCTCCGCGACGGCGACGCCGAGGGGCTGCGCCGCGCCGCG  
GCGCAGGTGGCCGCCGCGTGCGCCACGCACGTTGTTCTTCCAGGTGTCCGAGCACGGCGTCGACGCCGCTC  
TGGCGCGCGCCGCGCTCGACGGCGCCAGCGACTTCTTCCGCCTCCCGCTCGCCGAGAAGCGCCGCGCGCG  
CCGCGTCCCGGGACCGTGTCCGGCTACACCAGCGCCACGCCGACCGCTTCGCCTCCAAGCTCCCATGG  
AAGGAGACCTCTCCTTCGGCTTCCACGACCGCGCCGCCGCCCCCGTCGTCGCCGACTACTTCTCCAGCA  
CCCTCGGCCCCGACTTCGCGCCAATGGGGTAATTAACGATGGTGGACGACATTGCATTTCAAATTCAA  
AACAAATTCAAAACACACCGACCGAGATTATGCTGAATTCAAACGCGTTTGTGCGCGCAGGAGGGTGTAC  
CAGAAGTACTGCGAGGAGATGAAGGAGCTGTGCTGACGATCATGGAACCTGGAGCTGAGCCTGGGCG  
TGGAGCGAGGCTACTACAGGGAGTTCTTCGCGGACAGCAGCTCAATCATGCGGTGCAACTACTACCCGCC  
ATGCCCGGAGCCGGAGCGGACGCTCGGCACGGGCCCCGACTGCGACCCACCGCCCTACCATCCTCCTC  
CAGGACGACGTGGCGGCCTCGAGGTCCTCGTGCACGGCGAATGGCGCCCCGTGAGCCCCGTCCCCGGCG  
CCATGGTCATCAACATCGGCGACACCTTCATGGTAAACCATCTCCTATTCTCCTCTCCTCTGTTCTCCTC  
TGCTTCGAAGCAACAGAACAAAGTAATTCAGCTTTTTTTTTCTCTCTCGCGCGAAATTGACGAGAAAAATA  
AGATCGTGGTAGGGGCGGGGCTTTCAGCTGAAAGCGGGAAGAAACCGACCTGACGTGATTTCTCTGTTCC  
AATCACAAACAATGGAATGCCCCACTCCTCCATGTGTTATGATTTATCTCACATCTTATAGTTAATAGGA  
GTAAGTAACAAGCTACTTTTTTCATATTATAGTTCGTTTGATTTTTTTTTTTTTAAGTTTTTTAGTTTT  
ATCCAAATTTATTGAAAACTTAGCAACGTTTATAATACCAAATTAGTCTCATTTAGTTTAATATTGTAT  
ATATTTTGATAATATATTTATGTTATATTAATAATATTACTATATTTTTCTATAAACATTATTAAGGCC

ATTTATAATATAAAATGGAAGGAGTAATTAATATGGATCTCCCCGACATGAGAATATTTTCCGATGGTG  
TGACGACGCCATGTAAGCTTCGGTGGGCCTGGACGGCCAGAGGTGCCAACAGCCACGTCCAACAACCCCT  
GGGTCCCCCCTAACACTCCAAACAGTAGTGAGTAGTGTCTCGTCGCGTTTTAGTATTTGATGACAAACA  
AAGTGTGAGTTGAGTTAGCCACCACCAACTTGACACAGAGCACATACATTTGTGTCCATTCTCGCCAGTC  
ACTTCCATCTCTAGTCCTAACTCCTATCTAGCGATGTAAGCGGATAATTTATCATCCGTATATAAACCT  
GTTTGTTATAGTTAATTTCTATATAATACTATAACAGTATACATTTTAAAAGAAAACAAAATTAGGATA  
AACAGGCCCTGCTCCTATCCATCCATGGCACTTGGAAGGACCAGACTCGGTCATGCCATGCCAAGCCAAG  
ATATGGGTTATGGAAGAGTAGAGAAGAGGAGAGATGAGAGATAAGCATGCGTTCTCCTCCTCGTTGGATG  
TGTATTTTGGAGGGATTTGTGTAGTAGTAGCAGCGCGCCGCGGGACGGATGCGGATGGTGGCGCTTTC  
GGTGGCGTTTTCCCGGGGGGTTTTGGTTTGGCGCTTGGGGGGATGGCATGGCGCGGCGTGCGGCTGCA  
CGCCACACACACGCGCGCGCACGCACGTACGTCGTCGTCGCGCGGGCGGACGGTAGCTTAGGGTGGTGT  
GTTCCGCGCGCGGGCGCGGATTGTTCCATGCCGATCGATTTGGCGCCACCCTCGCCGCGGCTCTTGTCGC  
GTCGTGCGCCTCTCTCGCGCGTTTTGTCCTTGTCGCGTTGCTCAGCCGGCGACGGGGGCACGGACATTGG  
CGATGTAGCCCTGCACGTGTGCGCCTCTCCGTTGATGAATGATGATGTATGTATGTATTTTTTTTTGTCT  
GAAGGAATTTGTGGGGAATTGTTGTGTGTGCAGGCGCTGTGAACGGGAGGTATAAGAGCTGCCTGCACA  
GGGCGGTGGTGAACCAGCGCGGGAGCGGCGGTGCTGGCGTTCTTCCTGTGCCCGCGGGAGGACAGGGT  
GGTGGCGCCGCCGCCGAGCGCCGCCACGCCGACGACTACCCGACTTCACCTGGGCGGACCTCATGCGC  
TTCACGCAGCGCCACTACCGCGCCGACACCCGCACGCTCGACGCCTTCACGCGCTGGCTCGCGCCGCCGG  
CCGCCGACGCCGCCGCCGACGGCGCAGGTGAGGCGGCCAGCTGATCGCCGAACGGAACGAAACGGAACGA  
ACAGAAGCCGATTTTTGGCGGGGCCCACGCCACGTGAGGCCCCACGTGGACAGTGGGCCCGGGCGGAGG  
TGGCACCCACGTGGACCGCGGGCCCCGCGCCGCTTCCAATTTGGACCCTACCGCTGTACATATTCATA  
TATTGCAAGAAGAAGCAAAACGTACGTGTGGGTTGGGTTGGGCTTCTCTCTATTACTAAAAAAATATAA  
TGGAACGACGGATGAATGGATGCTTATTTATTTATCTAAATTGAATTCGAATTCGGCTCA

>Koshihikari\_d60

TGCCCAGACAGCTCGCCCTGCACACACACACACTCACACTCACACACGCTCTCAACTCACTCCCGCTC  
AACACAGCGCTCACTTCTCATCTCCAATCTCATGGTGGCCGAGCACCCACGCCACCACAGCCGCACCAA  
CCACCGCCCATGGAATCCACCGCCGGCTCTGGCATTGCCGCCCCGGCGGCGGCGGCGGTGTGCGACCTGA  
GGATGGAGCCCAAGATCCCGGAGCCATTGCTGTGGCCGAACGGCGACGCGAGGCCGGCGTGGCGGCGGA  
GCTGGACATGCCCGTGGTCGACGTGGGCGTGCTCCGCGACGGCGACGCCGAGGGGCTGCGCCGCGCCGCG  
GCGCAGGTGGCCGCCGCGTGCGCCACGCACGGTTTCTTCCAGGTGTCCGAGCACGGCGTCGACGCCGCTC  
TGGCGCGCGCCGCGCTCGACGGCGCCAGCGACTTCTCCGCCTCCCGCTCGCCGAGAAGCGCCGCGCGCG  
CCGCGTCCCGGGCACCGTGTCCGGCTACACCAGCGCCACGCCGACCGCTTCGCCTCCAAGCTCCCATGG  
AAGGAGACCTCTCCTTCGGCTTCCACGACCGCGCCGCCGCCCGTCTGTCGCGGACTACTTCTCCAGCA  
CCCTCGGCCCGGACTTCGCGCCAATGGGGTAATTAACGATGGTGGACGACATTGCATTTCAAATTCAA  
AACAAATTCAAAACACACCGACCGAGATTATGCTGAATTCAAACGCGTTTGTGCGCGCAGGAGGGTGTAC

CAGAAGTACTGCGAGGAGATGAAGGAGCTGTCGCTGACGATCATGGAACCTCTGGAGCTGAGCCTGGGCG  
TGGAGCGAGGCTACTACAGGGAGTTCTTCGCGGACAGCAGCTCAATCATGCGGTGCAACTACTACCGCC  
ATGCCCCGAGCCGGAGCGGACGCTCGGCACGGGCCCCGCACTGCGACCCACCGCCCTCACCATCCTCCTC  
CAGGACGACGTGCGCGGCCTCGAGGTCTCGTCGACGGCGAATGGCGCCCCGTAGCCCCGTCCCCGGCG  
CCATGGTCATCAACATCGGCGACACCTTCATGGTAAACCATCTCCTATTCTCCTCTCCTCTGTTCTCCTC  
TGCTTCGAAGCAACAGAAACAAGTAATCAAGCTTTTTTTTCTCTCTCGCGCGAAATTGACGAGAAAAATA  
AGATCGTGGTAGGGGCGGGGCTTTCAGCTGAAAGCGGGAAGAAACCGACCTGACGTGATTTCTCTGTTCC  
AATCACAAACAATGGAATGCCCCACTCCTCCATGTGTTATGATTTATCTCACATCTTATAGTTAATAGGA  
GTAAGTAACAAGCTACTTTTTTCATATTATAGTTCGTTTGATTTTTTTTTTTTTAAGTTTTTTAGTTTT  
ATCCAAATTTATTGAAAACTTAGCAACGTTTATAATACAAATTAGTCTCATTTAGTTTAATATTGTAT  
ATATTTTGATAATATATTTATGTTATATTAATAAATATTACTATATTTTTCTATAAACATTATTAAGCC  
ATTTATAATATAAAATGGAAGGAGTAATTAATATGGATCTCCCCGACATGAGAATATTTTCCGATGGTG  
TGACGACGCCATGTAAGCTTCGGTGGGCCTGGACGGCCAGAGGTGCCAACAGCCACGTCCAACAACCCCT  
GGGTCCCCCCTAACACTCCAAACAGTAGTGAGTAGTGTCTCGTCGCGTTTTAGTATTTGATGACAAACA  
AAGTGTGAGTTGAGTTAGCCACCACCAACTTGACACGAGCACATACATTTGTGTCCATTCTCGCCAGTC  
ACTTCCATCTCTAGTCCTAACTCCTATCTAGCGATGTAAGCGGATAATTTATCATCCGTATATAAACCT  
GTTTGTTATAGTTAATTTCTATATAATACTATAACAGTATACATTTTAAAGAAAACAAAATTAGGATA  
AACAGGCCCTGCTCCTATCCATCCATGGCACTTGGAAGGACCAGACTCGGTCATGCCATGCCAAGCCAAG  
ATATGGGTTATGGAAGAGTAGAGAAGAGGAGAGATGAGAGATAAGCATGCGTTCTCCTCCTCGTTGGATG  
TGATTTTTGGAGGGATTTGTGTAGTAGTAGCAGCGCGCGCGGGACGGATGCGGATGGTGGCGCTTTC  
GGTGGCGTTTTCCCGGGGGGGTTTTGGTTTGGCGCTTGGGGGGATGGCATGGCGCGGCGTGCGGCTGCA  
CGCCACACACACGCGCGCGCACGCACGTACGTGCTCGTCGCGCGGGCGGACGGTAGCTTAGGGTGGTGT  
GTTCCGCGCGCGGGCGCGGATTGTTCCATGCCGATCGATTTGGCGCCACCCTCGCCGCGGCTCTTGTCGC  
GTCGTGCGCCTCTCTCGCGCGGTTTGTCTTGTGCGGTTGCTCAGCCGGCGACGGGGGCACGGACATTGG  
CGATGTAGCCCTGCACGTGTGGCCTCTCCGTTGATGAATGATGATGTATGTATGTATTTTTTTTTGTCT  
GAAGGAATTTGTGGGAATTGTTGTGTGTGCAGGCGCTGTGAACGGGAGGTATAAGAGCTGCCTGCACA  
GGGCGGTGGTGAACCAGCGGCGGGAGCGGCGGTGCTGGCGTTCTTCCTGTGCCCCGCGGAGGACAGGGT  
GGTGGCGCCGCCGCCGAGCGCGCCACGCCGACGACTACCCGACTTCACCTGGGCCGACCTCATGCGC  
TTCACGCAGCGCCACTACCGCGCCGACACCCGCACGCTCGACGCCTTCACGCGCTGGCTCGCGCCGCCGG  
CCGCCGACGCCGCCGCGACGGCGCAGGTGAGGCGGCCAGCTGATCGCCGAACGGAACGAAACGGAACGA  
ACAGAAGCCGATTTTTGGCGGGGGCCACGCCACGTGAGGCCCCACGTGGACAGTGGGCCCGGGCGGAGG  
TGGCACCCACGTGGACCGCGGGCCCCGCGCCGCTTCCAATTTGGACCCTACCGCTGTACATATTCATA  
TATTGCAAGAAGAAGCAAAACGTACGTGTGGGTTGGGTTGGGCTTCTCTCTATTACTAAAAAAATATAA  
TGGAACGACGGATGAATGGATGCTTATTTATTTATCTAAATTGAATTCGAATTCGGCTCA

>Koshihikari\_d60+sd1

TGCCCAGACAGCTCGCCCTGCACACACACACACTCACACTCACACACGCTCTCAACTCACTCCCGCTC  
AACACAGCGCTCACTTCTCATCTCCAATCTCATGGTGGCCGAGCACCCACGCCACCACAGCCGCACCAA  
CCACCGCCCATGGAATCCACCGCCGGCTCTGGCATTGCCGCCCCGGCGGCGGCGGCGGTGTGCGACCTGA  
GGATGGAGCCCAAGATCCCGGAGCCATTCTGTGTGGCCGAACGGCGACGCGAGGCCGGCGTCTGGCGGCGGA  
GCTGGACATGCCCGTGGTCGACGTGGGCGTGTCTCCGCGACGGCGACGCCGAGGGGCTGCGCCGCGCCGCG  
GCGCAGGTGGCCGCGCGTGTGCGCCACGCACGTTGTTCTTCCAGGTGTCCGAGCACGGCGTGTGACGCCGCTC  
TGGCGCGCGCCGCGCTGTGACGGCGCCAGCGACTTCTTCCGCCTCCCGCTCGCCGAGAAGCGCCGCGCGCG  
CCGCGTCCCGGGCACCGTGTCCGGCTACACCAGCGCCACGCCGACCGCTTCCGCTCCAAGCTCCCATGG  
AAGGAGACCTCTCCTTCGGCTTCCACGACCGCGCCGCGCCCGCCCGCTCGTCGCCGACTACTTCTCCAGCA  
CCCTCGGCCCCGACTTGTGCGCCAATGGGGTAATTAACGATGGTGGACGACATTGCATTTCAAATTCAA  
AACAAATTCAAAACACACCGACCGAGATTATGCTGAATCAAACGCGTTTGTGCGCGCAGGAGGGTGTAC  
CAGAAGTACTGCGAGGAGATGAAGGAGCTGTGCTGACGATCATGGAACCTGGAGCTGAGCCTGGGCG  
TGGAGCGAGGCTACTACAGGGAGTTCTTCCGCGACAGCAGCTCAATCATGCGGTGCAACTACTACCCGCC  
ATGCCCGGAGCCGGAGCGGACGCTCGGCACGGGCCCCGCACTGCGACCCACCGCCCTCACCATCCTCCTC  
CAGGACGACGTGGCGGCCCTCGAGGTCTCGTGTGACGGCGAATGGCGCCCCGTGAGCCCCGTCCCCGGCG  
CCATGGTCATCAACATCGGCGACACCTTCATGGTAAACCATCTCCTATTCTCCTCTCCTCTGTTCTCCTC  
TGCTTCGAAGCAACAGAACAAAGTAATTAAGCTTTTTTTTTCTCTCTCGCGCGAAATTGACGAGAAAAATA  
AGATCGTGGTAGGGGCGGGGCTTTCAGCTGAAAGCGGGAAGAAACCGACCTGACGTGATTTCTCTGTTCC  
AATCACAAACAATGGAATGCCCCACTCCTCCATGTGTTATGATTTATCTCACATCTTATAGTTAATAGGA  
GTAAGTAACAAGCTACTTTTTTCATATTATAGTTGTTTTGATTTTTTTTTTTTTAAGTTTTTTAGTTTT  
ATCCAAATTTATTGAAAACTTAGCAACGTTTATAATACCAAATTAGTCTCATTTAGTTTAATATTGTAT  
ATATTTTGATAATATATTTATGTTATATTAATAATTAATTAATTAATTAATTAATTAATTAATTAATTA  
ATTTATAATATAAAATGGAAGGAGTAATTAATATGGATCTCCCCGACATGAGAATATTTTCCGATGGTG  
TGACGACGCCATGTAAGCTTCGGTGGGCCTGGACGGCCAGAGGTGCCAACAGCCACGTCCAACAACCCCT  
GGGTCCCCCCTAACACTCCAAACAGTAGTGAGTAGTGTCTCGTCGCGTTTTAGTATTTGATGACAAACA  
AAGTGTGAGTTGAGTTAGCCACCACCAACTTGCACACGAGCACATACATTTGTGTCCATTCTCGCCAGTC  
ACTTCCATCTCTAGTCCTAACTCCTATCTAGCGATGTAAGCGGATAATTTATCATCCGTATATAAACCT  
GTTTGTTATAGTTAATTTCTATATAATACTATAACAGTATACATTTTAAAAGAAAACAAATTAGGATA  
AACAGGCCCTGCTCCTATCCATCCATGGCACTTGAAGGACCAGACTCGGTATGCCATGCCAAGCCAAG  
ATATGGGTTATGGAAGAGTAGAGAAGAGGAGAGATGAGAGATAAGCATGCGTTCTCCTCCTCGTTGGATG  
TGATTTTTGGAGGGATTTGTGTAGTAGTAGCAGCGCGCCGCGGGACGGATGCCGATGGTGGCGCTTTC  
GGTGGCGTTTTCCCGGGGGGGTTTTGGTTTTGGCGCTTGGGGGGGATGGCATGGCGCGGCGTGGCGCTGCA  
CGCCACACACACGCGCGCGCACGCACGTACGTGTCGTGCGCGGGCGGACGGTAGCTTAGGGTGGTGT  
GTTCCGCGCGCGGGCGCGGATTGTTCCATGCCGATCGATTTGGCGCCACCCTCGCCGCGGCTCTTGTGCG  
GTCGTGCGCCTCTCTCGCGCGGTTTTGTCCTTGTGCGGTTGCTCAGCCGGCGACGGGGGCACGGACATTGG  
CGATGTAGCCCTGCACGTGTGGCCCTCTCCGTTGATGAATGATGATGTATGTATGTATTTTTTTTTGTCT

GAAGGAATTTGTGGGGAATTGTTGTGTGTGCAGGCGCTGTGGAACGGGAGGTATAAGAGCTGCCTGCACA  
GGGCGGTGGTGAACCAGCGGCGGGAGCGGCGGTGCTGGCGTTCTTCCTGTGCCCAGGGAGGACAGGGT  
GGTGCGGCCGCCGCCGAGCGCGCCACGCCGAGCACTACCCGACTTCACCTGGGCCGACCTCATGCGC  
TTCACGCAGCGCCACTACCGCGCCGACACCCGCACGCTCGACGCCTTCACGCGCTGGCTCGCGCCGCCGG  
CCGCCGACGCCGCCGCCGACGGCGCAGGTGAGGCGGCCAGCTGATCGCCGAACGGAACGAAACGGAACGA  
ACAGAAGCCGATTTTTGGCGGGGGCCACGCCACGTGAGGCCCCACGTGGACAGTGGGCCCGGGCGGAGG  
TGGCACCCACGTGGACCGCGGGCCCCGCGCCGCTTCCAATTTGGACCCTACCGCTGTACATATTCATA  
TATTGCAAGAAGAAGCAAAACGTACGTGTGGGTTGGGTTGGGCTTCTCTCTATTACTAAAAAATATAA  
TGGAACGACGGATGAATGGATGCTTATTTATTTATCTAAATTGAATTCGAATTCGGCTCA

SNP is shown as red.
